# Supplementary material for: Plumbagin-Loaded Glycerosome Gel as Topical Delivery System for Skin Cancer Therapy
Source: Polymers (Basel). 2021 Mar 17;13(6):923. doi: 10.3390/polym13060923 (PMC8002493; doi:10.3390/polym13060923)
Supplement: Supplementary file 1 [file polymers-13-00923-s001.pdf]

## Supplementary data sheet

**Table 1S. The particle size, PDI, zeta potential, entrapment efficiency and drug loading of PLM-loaded glycosome, PLM-loaded CL and rhodamine-loaded glycosome**

| Characterizations         | PLM loaded CL      | PLM-loaded glycosome | Rhodamine-loaded glycosome |
|---------------------------|--------------------|----------------------|----------------------------|
| Vesicle size (nm)         | 129.56 $\pm$ 17.05 | 119.20 $\pm$ 15.67   | 121.50 $\pm$ 13.67         |
| PDI                       | 0.245 $\pm$ 0.032  | 0.145 $\pm$ 0.02     | 0.155 $\pm$ 0.03           |
| Zeta potential (mV)       | -22.50 $\pm$ 5.61  | -27 $\pm$ 5.12       | -25 $\pm$ 6.33             |
| Entrapment efficiency (%) | 71.67 $\pm$ 11.08  | 76.42 $\pm$ 9.98     | 75.31 $\pm$ 9.78           |
| Drug loading (%)          | 3.06 $\pm$ 0.12    | 7.64 $\pm$ 1.12      | -                          |

### 1. Characterization of PLM-loaded conventional liposomes

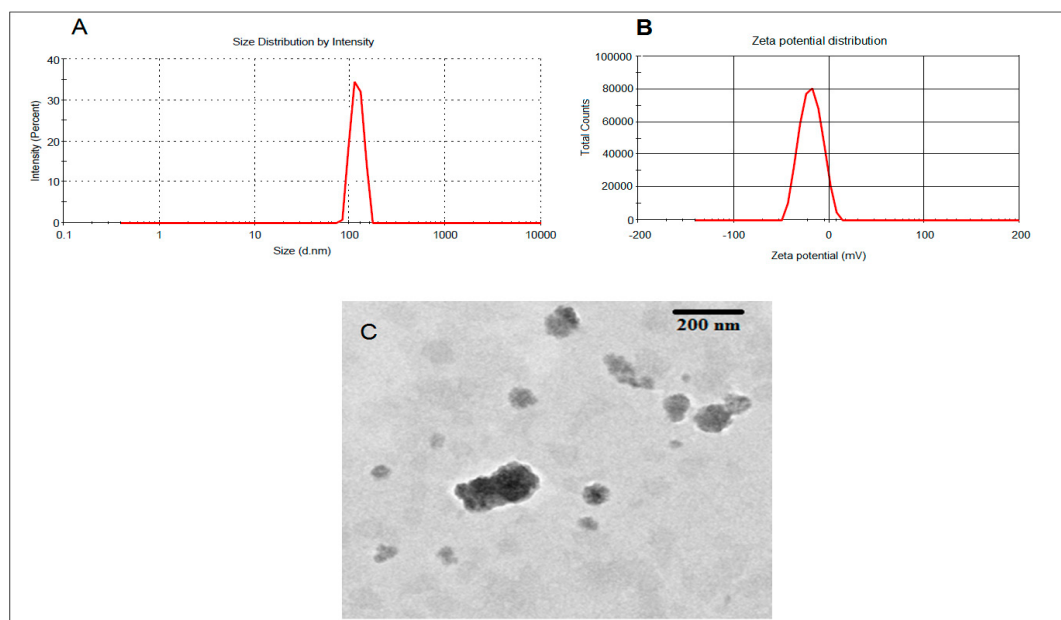

**Figure S1.** Diagram showing (A) Average size of vesicle  $129.56 \pm 17.05$  nm; PI  $0.245 \pm 0.032$ , (B) zeta potential  $-22.50 \pm 5.61$  (mV), and (C) Transmission electron micrograph of optimised PLM loaded liposome formulation.

**Table S2. Drug release kinetic analysis of optimized PLM-loaded GM formulation**

| Model            | n     | k     | R <sup>2</sup> |
|------------------|-------|-------|----------------|
| Zero order       | 1.00  | 0.316 | 0.9027         |
| First order      | 0.698 | 0.667 | 0.7240         |
| Higuchi          | 0.492 | 0.018 | 0.9758         |
| Korsmeyer-Pappas | 0.670 | 1.679 | 0.9495         |
| Hixson Crowell   | 0.732 | 1.278 | 0.8421         |
